# Supplementary material for: Comparative Genomics Applied to Systematically Assess Pathogenicity Potential in Shiga Toxin-Producing Escherichia coli O145:H28
Source: MDPI journal article supplement (doi:10.3390/microorganisms10050866), 2022-04-21

Figure S2. Comparative analyses of PAIs in STEC strains. A: Relatedness of LEE islands; B: Relatedness of the OI-122 islands; C: Relatedness of the OI-57 islands; D: Relatedness of the TRIs. The DNA sequences of 22 LEE islands (A), 21 OI-122 islands (B), 20 OI-57 islands (C), and 24 TRIs (D) were aligned in Geneious Prime®, correspondingly, using Clustal Omega, followed by constructing a consensus tree using Jukes-Cantor Genetic Distance Model and Neighbor-Joining Tree Build Method without an outgroup as detailed in the Materials and Methods section.

A

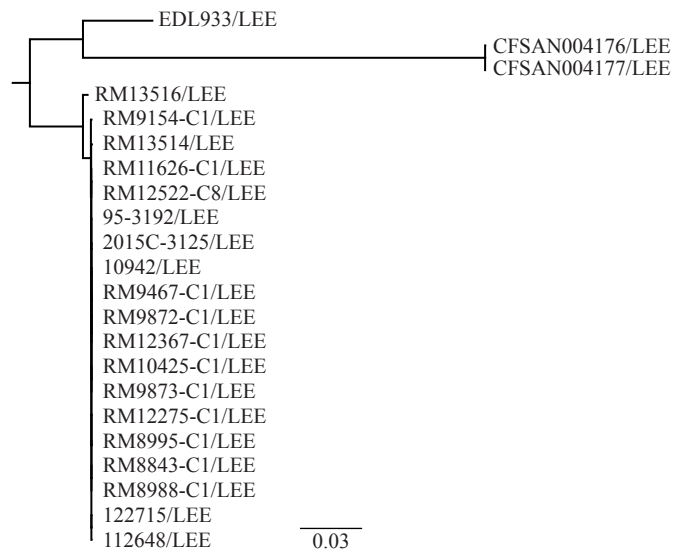

B

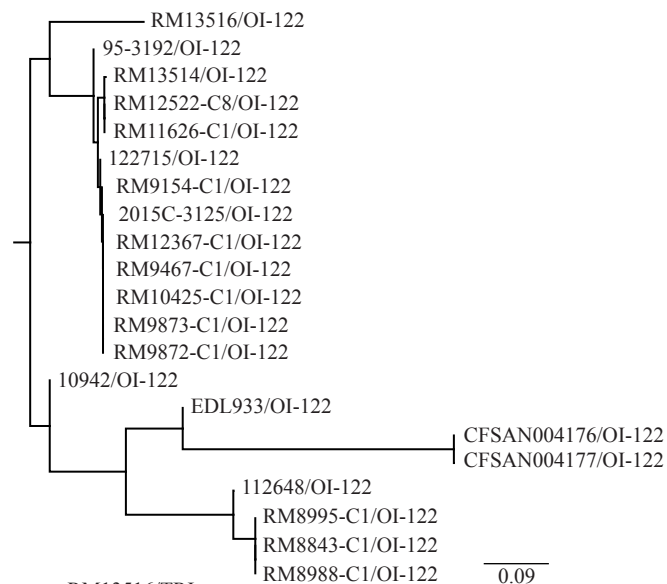

C

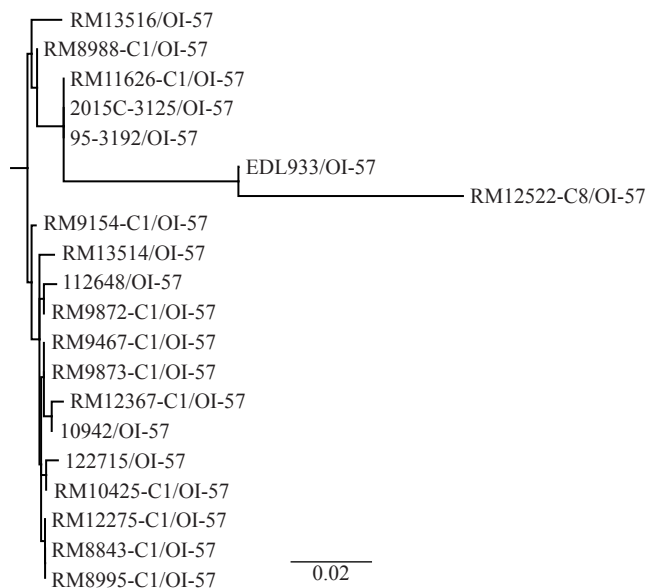

D

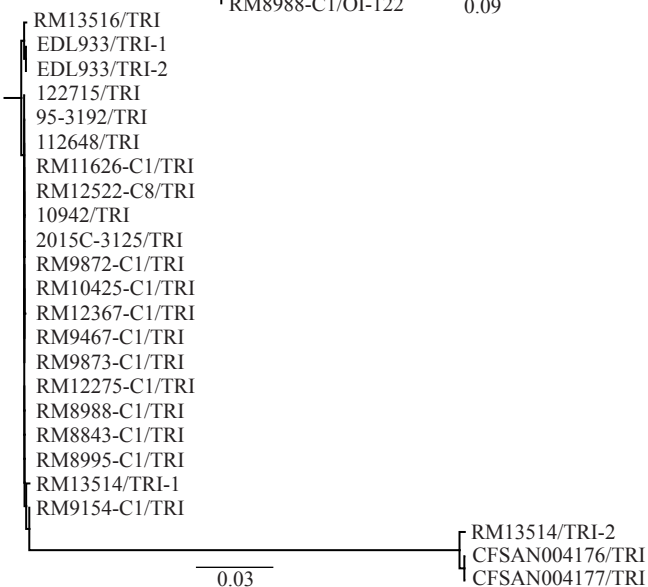

Supplement: s1 [file s1]
