# Supplementary material for: Comparative Genomics Applied to Systematically Assess Pathogenicity Potential in Shiga Toxin-Producing Escherichia coli O145:H28
Source: MDPI journal article supplement (doi:10.3390/microorganisms10050866), 2022-04-21
Supplement: s1 [file s1]

Table S2. Mutations in virulence genes

| VFclass                       | Virulence factors              | Genes            | EDL933                  | CFSAN004176       | CFSAN004177       | RM13514                               | RM13516                               | 10942                                 | 112648                                | 122715                                | 95-3192*                              | 2015C-3125                            | RM8843-C1                             |
|-------------------------------|--------------------------------|------------------|-------------------------|-------------------|-------------------|---------------------------------------|---------------------------------------|---------------------------------------|---------------------------------------|---------------------------------------|---------------------------------------|---------------------------------------|---------------------------------------|
| Adherence                     | Curli                          | <i>csgB</i>      | WT                      | WT                | WT                | WT                                    | WT                                    | WT                                    | Nonsense mutation                     | WT                                    | WT                                    | WT                                    | WT                                    |
|                               | ECP                            | <i>ecpE</i>      | WT                      | WT                | Point deletion    | WT                                    |
|                               | ELF                            | <i>elfC</i>      | Point deletion          | WT                | Point deletion    | WT                                    | WT                                    | WT                                    | WT                                    | WT                                    | WT                                    | Point deletion                        | Point deletion                        |
|                               |                                | <i>elfD</i>      | WT                      | WT                | Point deletion    | WT                                    |
|                               |                                | <i>elfG</i>      | WT                      | WT                | Point deletion    | WT                                    | WT                                    | WT                                    | WT                                    | WT                                    | Point deletion                        | WT                                    | WT                                    |
|                               | EaeH/Intimin like adhesin FdeC | <i>eaeH</i>      | WT                      | WT                | WT                | WT                                    | A                                     | WT                                    | WT                                    | WT                                    | WT                                    | WT                                    | WT                                    |
|                               | Intimin                        | <i>eae</i>       | WT                      | WT                | WT                | WT                                    | WT                                    | WT                                    | WT                                    | WT                                    | Point deletion                        | WT                                    | WT                                    |
|                               | ToxB                           | <i>toxB</i>      | WT                      | A                 | A                 | WT                                    | A                                     | WT                                    | WT                                    | WT                                    | NA                                    | Point deletion                        | WT                                    |
|                               | Type I fimbriae                | <i>fimB</i>      | WT                      | WT                | WT                | WT                                    | Point deletion                        | WT                                    | WT                                    | WT                                    | WT                                    | WT                                    | WT                                    |
|                               |                                | <i>fimD</i>      | WT                      | WT                | WT                | WT                                    | WT                                    | WT                                    | WT                                    | WT                                    | WT                                    | Point deletion                        | WT                                    |
| Autotransporter               | Antigen 43                     | <i>ag43</i>      | A                       | A                 | A                 | WT                                    | 1+0 (Point insertion)                 | A                                     | WT                                    | WT                                    | WT                                    | Point deletion                        | WT                                    |
|                               | Cah                            | <i>cah</i>       | WT                      | A                 | A                 | Transposon insertion                  | Large deletion                        | WT                                    | WT                                    | WT                                    | WT                                    | WT                                    | WT                                    |
|                               | EhaA                           | <i>ehaA</i>      | WT                      | WT                | WT                | WT                                    | WT                                    | WT                                    | WT                                    | WT                                    | WT                                    | WT                                    | WT                                    |
|                               | EhaB                           | <i>ehaB</i>      | WT                      | WT                | WT                | WT                                    | WT                                    | Transposon insertion                  | WT                                    | WT                                    | WT                                    | WT                                    | WT                                    |
|                               | EspP                           | <i>espP</i>      | WT                      | A                 | A                 | WT                                    | A                                     | WT                                    | WT                                    | WT                                    | A                                     | A                                     | WT                                    |
|                               | UpaG adhesin                   | <i>upaG/ehaG</i> | WT                      | WT                | WT                | WT                                    | WT                                    | Point insertion                       | WT                                    | WT                                    | WT                                    | WT                                    | WT                                    |
|                               | Invasion                       | <i>lbeC</i>      | WT                      | WT                | WT                | WT                                    | WT                                    | WT                                    | WT                                    | WT                                    | WT                                    | 1+0 (Point deletion)                  | WT                                    |
| Iron uptake                   | Aerobactin siderophore         | <i>iucC</i>      | A                       | A                 | A                 | WT                                    |
|                               |                                | <i>iucD</i>      | A                       | A                 | A                 | WT                                    |
|                               | Salmochelinsiderophore         | <i>iroB</i>      | 1+0 (Nonsense mutation) | A                 | A                 | WT                                    | WT                                    | WT                                    | WT                                    | WT                                    | WT                                    | Point deletion                        | WT                                    |
| LEE encoded TTSS effectors    | EspF                           | <i>espF</i>      | WT                      | WT                | Point deletion    | Large deletion                        | WT                                    | WT                                    | WT                                    | WT                                    | Point deletion                        | Point deletion                        | WT                                    |
|                               | EspG                           | <i>espG</i>      | WT                      | WT                | Point deletion    | WT                                    |
|                               | EspH                           | <i>espH</i>      | WT                      | WT                | Point deletion    | WT                                    |
|                               | Tir                            | <i>tir</i>       | WT                      | WT                | Point deletion    | WT                                    | WT                                    | WT                                    | WT                                    | WT                                    | Point deletion                        | WT                                    | WT                                    |
| nonLEE encoded TTSS effectors | EspN                           | <i>espN</i>      | Point insertion         | Point deletion    | Point deletion    | WT                                    | WT                                    | WT                                    | WT                                    | WT                                    | WT                                    | Point deletion                        | WT                                    |
|                               | EspV                           | <i>espV</i>      | WT                      | WT                | WT                | WT                                    | WT                                    | 1+0 (Transposon insertion)            | 1+0 (Nonsense mutaiton)               | 1+0 (Transposon insertion)            | 1+0 (Transposon insertion )           | 1+0 (Transposon insertion)            | 1+0 (Nonsense mutaiton)               |
|                               | EspW                           | <i>espW</i>      | WT                      | Point deletion    | WT                | A                                     | A                                     | A                                     | A                                     | A                                     | A                                     | A                                     | A                                     |
|                               | EspX1                          | <i>espX1</i>     | WT                      | Point deletion    | Point deletion    | WT                                    |
|                               | EspX4                          | <i>espX4</i>     | WT                      | Nonsense mutation | Nonsense mutation | WT                                    | Point deletion                        |
|                               | EspX7                          | <i>espX7</i>     | WT                      | WT                | WT                | WT                                    | WT                                    | WT                                    | WT                                    | WT                                    | WT                                    | WT                                    | WT                                    |
|                               | EspY4                          | <i>espY4</i>     | WT                      | A                 | A                 | WT                                    |
|                               | EspY5                          | <i>espY5</i>     | WT                      | A                 | A                 | Nonsense mutation                     | WT                                    | Nonsense mutation                     |
|                               | NleC                           | <i>nleC</i>      | WT                      | WT                | WT                | Large insertion                       | WT                                    |
|                               | NleG2-3                        | <i>nleG2-3</i>   | WT                      | WT                | WT                | Point deletions (2) and insertion (1) |
| Secretion systems             | TTSS                           | ACE T6SS         | <i>tssF</i>             | WT                | WT                | WT                                    | WT                                    | WT                                    | WT                                    | WT                                    | Point deletion                        | WT                                    | WT                                    |
|                               |                                |                  | <i>aec32</i>            | WT                | WT                | WT                                    | WT                                    | WT                                    | WT                                    | WT                                    | WT                                    | WT                                    | WT                                    |
|                               |                                |                  | <i>cesL</i>             | WT                | WT                | WT                                    | WT                                    | WT                                    | WT                                    | WT                                    | WT                                    | WT                                    | WT                                    |
|                               |                                |                  | <i>escL</i>             | WT                | WT                | WT                                    | WT                                    | WT                                    | WT                                    | WT                                    | WT                                    | WT                                    | WT                                    |
|                               |                                |                  | <i>escN</i>             | WT                | WT                | Point deletion                        | WT                                    | WT                                    | WT                                    | WT                                    | WT                                    | Point deletion                        | Point deletion                        |
|                               |                                |                  | <i>escR</i>             | WT                | WT                | WT                                    | WT                                    | WT                                    | WT                                    | WT                                    | WT                                    | WT                                    | WT                                    |
|                               |                                |                  | <i>escU</i>             | WT                | WT                | WT                                    | WT                                    | WT                                    | WT                                    | WT                                    | WT                                    | WT                                    | WT                                    |
|                               |                                |                  | <i>glrR</i>             | WT                | WT                | WT                                    | WT                                    | WT                                    | WT                                    | WT                                    | WT                                    | WT                                    | WT                                    |
|                               |                                |                  | <i>hlyB</i>             | WT                | WT                | WT                                    | WT                                    | WT                                    | WT                                    | WT                                    | A                                     | Point deletion                        | WT                                    |
| Toxin                         | Enterohemolysin                | <i>hlyC</i>      | WT                      | WT                | WT                | WT                                    | WT                                    | WT                                    | WT                                    | WT                                    | A                                     | Point deletion                        | WT                                    |

WT: wild-type; A: absence; NA: not available

When both WT and mutated loci are present, 1 represents WT, while 0 represents loss-of-function mutations.

Point insertion or deletion: insertion or deletion of a single base within the coding sequence; Large insertion or deletion: insertion or deletion of a oligonucleotide within the coding region.

[illegible]
