# Supplementary material for: Comparative Genomics Applied to Systematically Assess Pathogenicity Potential in Shiga Toxin-Producing Escherichia coli O145:H28
Source: MDPI journal article supplement (doi:10.3390/microorganisms10050866), 2022-04-21
Supplement: s1 [file s1]

Table S1. *E. coli* virulence genes<sup>1</sup>.

| VFclass   | Virulence factors                               | Genes2           | Strain/Pathotype                                      | GenBank<br>Accession/Replicon  | Locus ID       | Genomic<br>subset <sup>3</sup> | EDL933 | CFSAN004176 | CFSAN004177 | RM13514 | RM13516 | 10942 | 112648 | 122715 | 95-<br>3192 <sup>4</sup> | 2015C-<br>0315 | RM8843-<br>C1 | RM8988-<br>C1 | RM8995-<br>C1 | RM9154-<br>C1 | RM9467-<br>C1 | RM9872-<br>C1 | RM9873-<br>C1 | RM10425-<br>C1 | RM11626-<br>C1 | RM12275-<br>C1 | RM12367-<br>C1 | RM12522-<br>C8 |   |   |
|-----------|-------------------------------------------------|------------------|-------------------------------------------------------|--------------------------------|----------------|--------------------------------|--------|-------------|-------------|---------|---------|-------|--------|--------|--------------------------|----------------|---------------|---------------|---------------|---------------|---------------|---------------|---------------|----------------|----------------|----------------|----------------|----------------|---|---|
| Adherence | AAF/II fimbriae                                 | <i>aafA</i>      | <i>E. coli</i> O44:H18 str.<br>042/EAEC               | NC_017627/Plasmid pAA          | EC042_pAA048   | NA                             | 0      | 0           | 0           | 0       | 0       | 0     | 0      | 0      | 0                        | 0              | 0             | 0             | 0             | 0             | 0             | 0             | 0             | 0              | 0              | 0              | 0              | 0              |   |   |
|           |                                                 | <i>aafB</i>      |                                                       |                                | EC042_pAA030   | NA                             | 0      | 0           | 0           | 0       | 0       | 0     | 0      | 0      | 0                        | 0              | 0             | 0             | 0             | 0             | 0             | 0             | 0             | 0              | 0              | 0              | 0              | 0              |   |   |
|           |                                                 | <i>aafC</i>      |                                                       |                                | EC042_pAA031   | NA                             | 0      | 0           | 0           | 0       | 0       | 0     | 0      | 0      | 0                        | 0              | 0             | 0             | 0             | 0             | 0             | 0             | 0             | 0              | 0              | 0              | 0              | 0              |   |   |
|           |                                                 | <i>aafD</i>      |                                                       |                                | EC042_pAA046   | NA                             | 0      | 0           | 0           | 0       | 0       | 0     | 0      | 0      | 0                        | 0              | 0             | 0             | 0             | 0             | 0             | 0             | 0             | 0              | 0              | 0              | 0              | 0              |   |   |
|           | AAF/III fimbriae                                | <i>aggA</i>      | <i>E. coli</i> O104:H4 str.<br>2011C-3493<br>/StxEAEC | NC_018666<br>/Plasmid pAA-EA11 | O3K_26197      | NA                             | 0      | 0           | 0           | 0       | 0       | 0     | 0      | 0      | 0                        | 0              | 0             | 0             | 0             | 0             | 0             | 0             | 0             | 0              | 0              | 0              | 0              | 0              |   |   |
|           |                                                 | <i>aggB</i>      |                                                       |                                | O3K_26202      | NA                             | 0      | 0           | 0           | 0       | 0       | 0     | 0      | 0      | 0                        | 0              | 0             | 0             | 0             | 0             | 0             | 0             | 0             | 0              | 0              | 0              | 0              | 0              |   |   |
|           |                                                 | <i>aggC</i>      |                                                       |                                | O3K_26207      | NA                             | 0      | 0           | 0           | 0       | 0       | 0     | 0      | 0      | 0                        | 0              | 0             | 0             | 0             | 0             | 0             | 0             | 0             | 0              | 0              | 0              | 0              | 0              |   |   |
|           |                                                 | <i>aggD</i>      |                                                       |                                | O3K_26212      | NA                             | 0      | 0           | 0           | 0       | 0       | 0     | 0      | 0      | 0                        | 0              | 0             | 0             | 0             | 0             | 0             | 0             | 0             | 0              | 0              | 0              | 0              | 0              |   |   |
|           |                                                 | <i>aggR</i>      |                                                       |                                | O3K_26097      | NA                             | 0      | 0           | 0           | 0       | 0       | 0     | 0      | 0      | 0                        | 0              | 0             | 0             | 0             | 0             | 0             | 0             | 0             | 0              | 0              | 0              | 0              | 0              |   |   |
|           |                                                 |                  |                                                       |                                |                |                                |        |             |             |         |         |       |        |        |                          |                |               |               |               |               |               |               |               |                |                |                |                |                |   |   |
|           | Afimbrial adhesin AFA-I                         | <i>afaA</i>      | <i>E. coli</i> str. VR50<br>/UPEC                     | NZ_CP011134/Chromosome         | ECVR50_3238    | NA                             | 0      | 0           | 0           | 0       | 0       | 0     | 0      | 0      | 0                        | 0              | 0             | 0             | 0             | 0             | 0             | 0             | 0             | 0              | 0              | 0              | 0              | 0              | 0 |   |
|           |                                                 | <i>afaB</i>      |                                                       |                                | ECVR50_3237    | NA                             | 0      | 0           | 0           | 0       | 0       | 0     | 0      | 0      | 0                        | 0              | 0             | 0             | 0             | 0             | 0             | 0             | 0             | 0              | 0              | 0              | 0              | 0              | 0 |   |
|           |                                                 | <i>afaC</i>      |                                                       |                                | ECVR50_3236    | NA                             | 0      | 0           | 0           | 0       | 0       | 0     | 0      | 0      | 0                        | 0              | 0             | 0             | 0             | 0             | 0             | 0             | 0             | 0              | 0              | 0              | 0              | 0              | 0 |   |
|           |                                                 | <i>afaD</i>      |                                                       |                                | ECVR50_3235    | NA                             | 0      | 0           | 0           | 0       | 0       | 0     | 0      | 0      | 0                        | 0              | 0             | 0             | 0             | 0             | 0             | 0             | 0             | 0              | 0              | 0              | 0              | 0              | 0 |   |
|           |                                                 | <i>afaE</i>      |                                                       |                                | ECVR50_3233    | NA                             | 0      | 0           | 0           | 0       | 0       | 0     | 0      | 0      | 0                        | 0              | 0             | 0             | 0             | 0             | 0             | 0             | 0             | 0              | 0              | 0              | 0              | 0              | 0 |   |
|           |                                                 | <i>draP</i>      |                                                       |                                | ECVR50_3234    | NA                             | 0      | 0           | 0           | 0       | 0       | 0     | 0      | 0      | 0                        | 0              | 0             | 0             | 0             | 0             | 0             | 0             | 0             | 0              | 0              | 0              | 0              | 0              | 0 |   |
|           | CFA/I fimbriae                                  | <i>cfaA</i>      | <i>E. coli</i> O103:H2 str.<br>12009/EHEC             | NC_013353/Chromosome           | ECO103_3842    | A                              | 0      | 1           | 1           | 0       | 0       | 0     | 0      | 0      | 0                        | 0              | 0             | 0             | 0             | 0             | 0             | 0             | 0             | 0              | 0              | 0              | 0              | 0              | 0 |   |
|           |                                                 | <i>cfaB</i>      |                                                       |                                | ECO103_3841    | A                              | 0      | 1           | 1           | 0       | 0       | 0     | 0      | 0      | 0                        | 0              | 0             | 0             | 0             | 0             | 0             | 0             | 0             | 0              | 0              | 0              | 0              | 0              | 0 |   |
|           |                                                 | <i>cfaC</i>      |                                                       |                                | ECO103_3840    | A                              | 0      | 1           | 1           | 0       | 0       | 0     | 0      | 0      | 0                        | 0              | 0             | 0             | 0             | 0             | 0             | 0             | 0             | 0              | 0              | 0              | 0              | 0              | 0 |   |
|           |                                                 | <i>cfaD/cfaE</i> |                                                       |                                | ECO103_3839    | A                              | 0      | 1           | 1           | 0       | 0       | 0     | 0      | 0      | 0                        | 0              | 0             | 0             | 0             | 0             | 0             | 0             | 0             | 0              | 0              | 0              | 0              | 0              | 0 |   |
|           | Curli fimbriae                                  | <i>csgD</i>      | <i>E. coli</i> O157:H7 str.<br>EDL933/EHEC            | NC_002655/Chromosome           | Z1673          | C                              | 1      | 1           | 1           | 1       | 1       | 1     | 1      | 1      | 1                        | 1              | 1             | 1             | 1             | 1             | 1             | 1             | 1             | 1              | 1              | 1              | 1              | 1              | 1 |   |
|           |                                                 | <i>csgE</i>      |                                                       |                                | Z1672          | C                              | 1      | 1           | 1           | 1       | 1       | 1     | 1      | 1      | 1                        | 1              | 1             | 1             | 1             | 1             | 1             | 1             | 1             | 1              | 1              | 1              | 1              | 1              | 1 |   |
|           |                                                 | <i>csgF</i>      |                                                       |                                | Z1671          | C                              | 1      | 1           | 1           | 1       | 1       | 1     | 1      | 1      | 1                        | 1              | 1             | 1             | 1             | 1             | 1             | 1             | 1             | 1              | 1              | 1              | 1              | 1              | 1 |   |
|           |                                                 | <i>csgG</i>      |                                                       |                                | Z1670          | C                              | 1      | 1           | 1           | 1       | 1       | 1     | 1      | 1      | 1                        | 1              | 1             | 1             | 1             | 1             | 1             | 1             | 1             | 1              | 1              | 1              | 1              | 1              | 1 |   |
|           |                                                 | <i>csgA</i>      |                                                       |                                | Z1676          | C                              | 1      | 1           | 1           | 1       | 1       | 1     | 1      | 1      | 1                        | 1              | 1             | 1             | 1             | 1             | 1             | 1             | 1             | 1              | 1              | 1              | 1              | 1              | 1 |   |
|           |                                                 | <i>csgB</i>      |                                                       |                                | Z1675          | C                              | 1      | 1           | 1           | 1       | 1       | 1     | 1      | 0      | 1                        | 1              | 1             | 1             | 1             | 1             | 1             | 1             | 1             | 1              | 1              | 1              | 1              | 1              | 1 | 1 |
|           |                                                 | <i>csgC</i>      |                                                       |                                | Z1677          | C                              | 1      | 1           | 1           | 1       | 1       | 1     | 1      | 1      | 1                        | 1              | 1             | 1             | 1             | 1             | 1             | 1             | 1             | 1              | 1              | 1              | 1              | 1              | 1 |   |
|           |                                                 |                  |                                                       |                                |                |                                |        |             |             |         |         |       |        |        |                          |                |               |               |               |               |               |               |               |                |                |                |                |                |   |   |
|           | Dispersin                                       | <i>aap</i>       | <i>E. coli</i> O44:H18 str.<br>042/EAEC               | NC_017627/Plasmid pAA          | EC042_pAA055   | NA                             | 0      | 0           | 0           | 0       | 0       | 0     | 0      | 0      | 0                        | 0              | 0             | 0             | 0             | 0             | 0             | 0             | 0             | 0              | 0              | 0              | 0              | 0              |   |   |
|           | <i>E. coli</i> common pilus (ECP)               | <i>ecpA</i>      | <i>E. coli</i> O104:H4 str.<br>2011C-3493<br>/StxEAEC | NC_018658/Chromosome           | O3K_20025      | C                              | 1      | 1           | 1           | 1       | 1       | 1     | 1      | 1      | 1                        | 1              | 1             | 1             | 1             | 1             | 1             | 1             | 1             | 1              | 1              | 1              | 1              | 1              | 1 |   |
|           |                                                 | <i>ecpB</i>      |                                                       |                                | O3K_20030      | C                              | 1      | 1           | 1           | 1       | 1       | 1     | 1      | 1      | 1                        | 1              | 1             | 1             | 1             | 1             | 1             | 1             | 1             | 1              | 1              | 1              | 1              | 1              |   |   |
|           |                                                 | <i>ecpC</i>      |                                                       |                                | O3K_20035      | C                              | 1      | 1           | 1           | 1       | 1       | 1     | 1      | 1      | 1                        | 1              | 1             | 1             | 1             | 1             | 1             | 1             | 1             | 1              | 1              | 1              | 1              | 1              |   |   |
|           |                                                 | <i>ecpD</i>      |                                                       |                                | O3K_20040      | C                              | 1      | 1           | 1           | 1       | 1       | 1     | 1      | 1      | 1                        | 1              | 1             | 1             | 1             | 1             | 1             | 1             | 1             | 1              | 1              | 1              | 1              | 1              |   |   |
|           |                                                 | <i>ecpE</i>      |                                                       |                                | O3K_20045      | C                              | 1      | 1           | 0           | 1       | 1       | 1     | 1      | 1      | 1                        | 1              | 1             | 1             | 1             | 1             | 1             | 0             | 1             | 1              | 1              | 1              | 1              | 1              | 1 |   |
|           |                                                 | <i>ecpR</i>      |                                                       |                                | O3K_20020      | C                              | 1      | 1           | 1           | 1       | 1       | 1     | 1      | 1      | 1                        | 1              | 1             | 1             | 1             | 1             | 1             | 1             | 1             | 1              | 1              | 1              | 1              | 1              | 1 |   |
|           | <i>E.coli</i> laminin-binding<br>fimbriae (ELF) | <i>elfA</i>      | <i>E.coli</i> O26:H11 str.<br>11368/EHEC              | NC_013361/Chromosome           | ECO26_1065     | C                              | 1      | 1           | 1           | 1       | 1       | 1     | 1      | 1      | 1                        | 1              | 1             | 1             | 1             | 1             | 1             | 1             | 1             | 1              | 1              | 1              | 1              | 1              | 1 |   |
|           |                                                 | <i>elfC</i>      |                                                       |                                | ECO26_1067     | C                              | 0      | 1           | 0           | 1       | 1       | 1     | 1      | 1      | 0                        | 0              | 1             | 0             | 1             | 1             | 1             | 1             | 1             | 1              | 1              | 1              | 0              | 0              | 1 |   |
|           |                                                 | <i>elfD</i>      |                                                       |                                | ECO26_1066     | C                              | 1      | 1           | 0           | 1       | 1       | 1     | 1      | 1      | 1                        | 1              | 1             | 1             | 1             | 1             | 1             | 1             | 1             | 1              | 1              | 1              | 1              | 1              | 1 |   |
|           |                                                 | <i>elfG</i>      |                                                       |                                | ECO26_1068     | C                              | 0      | 1           | 0           | 1       | 1       | 1     | 1      | 1      | 1                        | 1              | 0             | 1             | 1             | 1             | 1             | 1             | 1             | 1              | 1              | 1              | 1              | 0              | 1 |   |
|           | Adhesin FdeC                                    | <i>eaeH</i>      | <i>E. coli</i> O157:H7 str.<br>EDL933/EHEC            | NC_002655/Chromosome           | Z0375          | A                              | 1      | 1           | 1           | 1       | 0       | 1     | 1      | 1      | 1                        | 1              | 1             | 1             | 1             | 0             | 1             | 1             | 1             | 0              | 1              | 1              | 0              | 1              | 1 |   |
|           | EtpA                                            | <i>etpA</i>      | <i>E. coli</i> O78:H11:K80<br>str. H10407/ETEC        | NC_017724/Plasmid p948         | ETEC_p948_0110 | NA                             | 0      | 0           | 0           | 0       | 0       | 0     | 0      | 0      | 0                        | 0              | 0             | 0             | 0             | 0             | 0             | 0             | 0             | 0              | 0              | 0              | 0              | 0              |   |   |
|           | F1C fimbriae                                    | <i>focA</i>      | <i>E. coli</i> str.<br>CFT073/UPEC                    | NC_004431/Chromosome           | c1239          | NA                             | 0      | 0           | 0           | 0       | 0       | 0     | 0      | 0      | 0                        | 0              | 0             | 0             | 0             | 0             | 0             | 0             | 0             | 0              | 0              | 0              | 0              | 0              | 0 |   |
|           |                                                 | <i>focC</i>      |                                                       |                                | c1241          | NA                             | 0      | 0           | 0           | 0       | 0       | 0     | 0      | 0      | 0                        | 0              | 0             | 0             | 0             | 0             | 0             | 0             | 0             | 0              | 0              | 0              | 0              | 0              | 0 |   |
|           |                                                 | <i>focD</i>      |                                                       |                                | c1242          | NA                             | 0      | 0           | 0           | 0       | 0       | 0     | 0      | 0      | 0                        | 0              | 0             | 0             | 0             | 0             | 0             | 0             | 0             | 0              | 0              | 0              | 0              | 0              | 0 |   |
|           |                                                 | <i>focF</i>      |                                                       |                                | c1243          | NA                             | 0      | 0           | 0           | 0       | 0       | 0     | 0      | 0      | 0                        | 0              | 0             | 0             | 0             | 0             | 0             | 0             | 0             | 0              | 0              | 0              | 0              | 0              | 0 |   |
|           |                                                 | <i>focG</i>      |                                                       |                                | c1244          | NA                             | 0      | 0           | 0           | 0       | 0       | 0     | 0      | 0      | 0                        | 0              | 0             | 0             | 0             | 0             | 0             | 0             | 0             | 0              | 0              | 0              | 0              | 0              | 0 |   |
|           |                                                 | <i>focH</i>      |                                                       |                                | c1245          | NA                             | 0      | 0           | 0           | 0       | 0       | 0     | 0      | 0      | 0                        | 0              | 0             | 0             | 0             | 0             | 0             | 0             | 0             | 0              | 0              | 0              | 0              | 0              | 0 |   |
|           |                                                 | <i>focI</i>      |                                                       |                                | c1240          | NA                             | 0      | 0           | 0           | 0       | 0       | 0     | 0      | 0      | 0                        |                |               |               |               |               |               |               |               |                |                |                |                |                |   |   |





[illegible]

|       |                                |                  |                                             |                         |                |                                |                      |             |    |   |   |   |   |   |   |   |   |   |   |   |   |   |   |   |   |   |   |   |
|-------|--------------------------------|------------------|---------------------------------------------|-------------------------|----------------|--------------------------------|----------------------|-------------|----|---|---|---|---|---|---|---|---|---|---|---|---|---|---|---|---|---|---|---|
|       |                                | NA               |                                             |                         | EC042_4542     | NA                             | 0                    | 0           | 0  | 0 | 0 | 0 | 0 | 0 | 0 | 0 | 0 | 0 | 0 | 0 | 0 | 0 | 0 | 0 | 0 | 0 | 0 |   |
|       |                                | NA               |                                             |                         | EC042_4543     | NA                             | 0                    | 0           | 0  | 0 | 0 | 0 | 0 | 0 | 0 | 0 | 0 | 0 | 0 | 0 | 0 | 0 | 0 | 0 | 0 | 0 | 0 | 0 |
|       |                                | NA               |                                             |                         | EC042_4544     | NA                             | 0                    | 0           | 0  | 0 | 0 | 0 | 0 | 0 | 0 | 0 | 0 | 0 | 0 | 0 | 0 | 0 | 0 | 0 | 0 | 0 | 0 | 0 |
|       |                                | NA               |                                             |                         | EC042_4545     | NA                             | 0                    | 0           | 0  | 0 | 0 | 0 | 0 | 0 | 0 | 0 | 0 | 0 | 0 | 0 | 0 | 0 | 0 | 0 | 0 | 0 | 0 | 0 |
|       |                                | NA               |                                             |                         | EC042_4546     | NA                             | 0                    | 0           | 0  | 0 | 0 | 0 | 0 | 0 | 0 | 0 | 0 | 0 | 0 | 0 | 0 | 0 | 0 | 0 | 0 | 0 | 0 | 0 |
|       |                                | NA               |                                             |                         | EC042_4547     | NA                             | 0                    | 0           | 0  | 0 | 0 | 0 | 0 | 0 | 0 | 0 | 0 | 0 | 0 | 0 | 0 | 0 | 0 | 0 | 0 | 0 | 0 | 0 |
|       |                                | NA               |                                             |                         | EC042_4548     | NA                             | 0                    | 0           | 0  | 0 | 0 | 0 | 0 | 0 | 0 | 0 | 0 | 0 | 0 | 0 | 0 | 0 | 0 | 0 | 0 | 0 | 0 | 0 |
|       |                                | NA               |                                             |                         | EC042_4549     | NA                             | 0                    | 0           | 0  | 0 | 0 | 0 | 0 | 0 | 0 | 0 | 0 | 0 | 0 | 0 | 0 | 0 | 0 | 0 | 0 | 0 | 0 | 0 |
|       |                                | NA               |                                             |                         | EC042_4550     | NA                             | 0                    | 0           | 0  | 0 | 0 | 0 | 0 | 0 | 0 | 0 | 0 | 0 | 0 | 0 | 0 | 0 | 0 | 0 | 0 | 0 | 0 | 0 |
| Toxin | Alpha-hemolysin                | hlyA             | <i>E. coli</i> O157:H7 str. EDL933/EHEC     | NC_007414/Plasmid pO157 | L7048          | A                              | 1                    | 1           | 1  | 1 | 1 | 1 | 1 | 0 | 1 | 1 | 1 | 1 | 1 | 1 | 1 | 1 | 1 | 1 | 1 | 1 | 1 |   |
|       |                                | hlyB             |                                             |                         | L7049          | A                              | 1                    | 1           | 1  | 1 | 1 | 1 | 1 | 0 | 0 | 1 | 1 | 1 | 1 | 1 | 1 | 1 | 1 | 1 | 1 | 1 | 1 |   |
|       |                                | hlyC             |                                             |                         | L7047          | A                              | 1                    | 1           | 1  | 1 | 1 | 1 | 1 | 0 | 0 | 1 | 1 | 1 | 1 | 1 | 0 | 1 | 1 | 1 | 1 | 1 | 1 | 1 |
|       |                                | hlyD             |                                             |                         | L7050          | A                              | 1                    | 1           | 1  | 1 | 1 | 1 | 1 | 1 | 0 | 1 | 1 | 1 | 1 | 1 | 1 | 1 | 1 | 1 | 1 | 1 | 1 | 1 |
|       |                                | Colicin-like Usp |                                             |                         | hcp            | <i>E. coli</i> str. UM146/AIEC | NC_017632/Chromosome | UM146_23345 | NA | 0 | 0 | 0 | 0 | 0 | 0 | 0 | 0 | 0 | 0 | 0 | 0 | 0 | 0 | 0 | 0 | 0 | 0 | 0 |
|       | Cytolethal distending toxin    | cdtA             | <i>E. coli</i> O18:K1:H7 str. IHE3034/NMEC  | NC_017628/Chromosome    | ECOK1_2089     | NA                             | 0                    | 0           | 0  | 0 | 0 | 0 | 0 | 0 | 0 | 0 | 0 | 0 | 0 | 0 | 0 | 0 | 0 | 0 | 0 | 0 | 0 |   |
|       |                                | cdtB             |                                             |                         | ECOK1_2088     | NA                             | 0                    | 0           | 0  | 0 | 0 | 0 | 0 | 0 | 0 | 0 | 0 | 0 | 0 | 0 | 0 | 0 | 0 | 0 | 0 | 0 | 0 |   |
|       |                                | cdtC             |                                             |                         | ECOK1_2087     | NA                             | 0                    | 0           | 0  | 0 | 0 | 0 | 0 | 0 | 0 | 0 | 0 | 0 | 0 | 0 | 0 | 0 | 0 | 0 | 0 | 0 | 0 |   |
|       | Cytotoxic necrotizing factor 1 | cnfI             | <i>E. coli</i> str. UM146/AIEC              | NC_017632/Chromosome    | UM146_21825    | NA                             | 0                    | 0           | 0  | 0 | 0 | 0 | 0 | 0 | 0 | 0 | 0 | 0 | 0 | 0 | 0 | 0 | 0 | 0 | 0 | 0 |   |   |
|       | Enterotoxin 1                  | pic              | <i>E. coli</i> O44:H18 str. 042/EAEC        | NC_017626/Chromosome    | EC042_4593     | NA                             | 0                    | 0           | 0  | 0 | 0 | 0 | 0 | 0 | 0 | 0 | 0 | 0 | 0 | 0 | 0 | 0 | 0 | 0 | 0 | 0 |   |   |
|       | Enterotoxin SenB/TieB          | senB             | <i>E. coli</i> str. UM146/AIEC              | NC_017630/Chromosome    | UM146_24581    | NA                             | 0                    | 0           | 0  | 0 | 0 | 0 | 0 | 0 | 0 | 0 | 0 | 0 | 0 | 0 | 0 | 0 | 0 | 0 | 0 | 0 |   |   |
|       | Heat-labile enterotoxin        | eltA             | <i>E. coli</i> O78:H11:K80 str. H10407/ETEC | NC_017722/Plasmid p666  | ETEC_p666_0660 | NA                             | 0                    | 0           | 0  | 0 | 0 | 0 | 0 | 0 | 0 | 0 | 0 | 0 | 0 | 0 | 0 | 0 | 0 | 0 | 0 | 0 | 0 |   |
|       |                                | eltB             |                                             |                         | ETEC_p666_0650 | NA                             | 0                    | 0           | 0  | 0 | 0 | 0 | 0 | 0 | 0 | 0 | 0 | 0 | 0 | 0 | 0 | 0 | 0 | 0 | 0 | 0 | 0 |   |
|       | Hemolysin/cytolysin A          | hlyE/clyA        | <i>E. coli</i> O157:H7 str. EDL933/EHEC     | NC_002655/Chromosome    | Z1944          | A                              | 1                    | 0           | 0  | 1 | 1 | 1 | 1 | 1 | 1 | 1 | 1 | 1 | 1 | 1 | 1 | 1 | 1 | 1 | 1 | 1 |   |   |
|       | Shiga-like toxin               | stx1A            | <i>E. coli</i> O157:H7 str. EDL933/EHEC     | NC_002655/Chromosome    | Z3344          | A                              | 1                    | 0           | 0  | 0 | 0 | 1 | 1 | 0 | 0 | 1 | 1 | 1 | 1 | 0 | 0 | 0 | 0 | 0 | 1 | 1 | 0 | 1 |
|       |                                | stx1B            |                                             |                         | Z3343          | A                              | 1                    | 0           | 0  | 0 | 0 | 1 | 1 | 0 | 0 | 1 | 1 | 1 | 0 | 0 | 0 | 0 | 0 | 1 | 1 | 0 | 1 |   |
|       |                                | stx2A            | <i>E. coli</i> O157:H7 str. EDL933/EHEC     | NC_002655/Chromosome    | Z1464          | A                              | 1                    | 1           | 1  | 1 | 1 | 1 | 2 | 1 | 1 | 1 | 0 | 0 | 0 | 1 | 1 | 1 | 1 | 0 | 0 | 2 | 0 |   |
| stx2B |                                | Z1465            |                                             |                         | A              | 1                              | 2                    | 1           | 1  | 1 | 1 | 2 | 1 | 1 | 1 | 0 | 0 | 0 | 1 | 1 | 1 | 1 | 1 | 0 | 0 | 2 | 0 |   |

<sup>1</sup>The number ≥1 refers to the wild-type (WT) gene and the number 0 indicates that either the gene is absent or carries a loss-of-function mutation. <sup>2</sup>NA, gene name is not available in the published genome annotations; <sup>3</sup>NA, not applicable; A, accessory gene; C, core gene; <sup>4</sup>Genome of strain 95-3192 in GenBank does not contain a pEHEC plasmid;
